# Supplementary material for: Patient Participation in Nursing Care: Views From Ghanaian Nurses, Nursing Students, and Patients
Source: PubMed Central journal article supplement — SAGE Open Nurs. 2019 Oct 10;5:2377960819880761. doi: 10.1177/2377960819880761 (PMC7774420; doi:10.1177/2377960819880761), 2019-10-10
Supplement: SON880761_Supplemental_Material.pdf [file SON880761_Supplemental_Material.pdf]

## **APPENDIX 1**

### **INTERVIEW GUIDE**

This study is being conducted to assess the views of patients, nurses and nursing students on participation of nursing care in Ghana. This interview guide contains open ended questions. You are expected to kindly provide genuine answers to the questions. The information you provide is confidential and will be used only for the purposes of this study. If you have any question, do not hesitate to ask the researchers. Your cooperation and participation until the completion of the data collection is very necessary for the successful completion of the study. However, your participation in this study is entirely up to you. You will not be penalised in anyway by refusing to participate.

#### **Section A: Demographics**

**Kindly tick as appropriate:**

- a. Age of respondent.
  - a. 20-24 years
  - b. 25-29 years
  - c. 30-34 years
  - d. 35-39 years
  - e. 40-44 years
  - f. 45-49 years
  - g. 50-54 years
  - h. 55-59 years
  - i. 60-64 years
  - j. 65-69 years
  - k. 70-74 years
  - l. 75-79 years
  - m. 80-84 years
  - n. 85-89 years
  - o. 90-94 years
  - p. other.....
  
- b. Category of participant
  - a. Practicing nurse
  - b. Patient

- c. Nursing student
  
- c. Educational status
  - a. No formal education
  - b. Nursery/Kindergarten
  - c. Primary school
  - d. Junior high school/JHS
  - e. Diploma
  - f. First degree
  - g. Masters
  - h. PhD
  
- d. Health facility
  - a. Private hospital
  - b. Public hospital
  
- e. Occupation
  - a. Employed
  - b. Part-time
  - c. Full time
  - d. Employed
  - e. Farmer
  - f. Teacher
  - g. Professional nurse
  - h. Student nurse
  - i. Unemployed
  - j. Other.....
  
- f. Rank/type
  - a. Staff nurse (SN)
  - b. Registered General Nurse (RGN)

- c. Senior staff nurse (SSN)
- d. Nursing officer (NO)
- e. Senior nursing officer (SNO)
- f. Principal nursing officer (PNO)
- g. Deputy Director of Nursing Services (DDNS)

g. Religion

- a. Islam
- b. Christianity
- c. Atheist
- d. Bhudist
- e. Traditional Religion
- f. Any other religion.....

h. Marital Status

- a. Single
- b. Co-habitation
- c. Married
- d. Divorced
- e. Widowed
- f. Separated
- g. Any other.....

i. Number of Children

- a. None
- b. One
- c. Two
- d. Three
- e. Four
- f. other, state.....

## **Section B: Interviews.**

1. Do you know what patient participation means? If yes, explain.
2. Describe your understanding of patient participation with regards to nursing practice in the Ashanti region of Ghana.
3. Describe any positive or negative experiences you had regarding patient participation of nursing care in hospitals in the Ashanti region.
4. Describe any experiences you wish to share regarding patient participation in hospitals within the Ashanti region.
5. Kindly explain what you will like changed about patient participation in nursing care in the Ashanti region.
6. Can you describe your role in patient participation in terms of nursing care in the health facility?
7. Do you need any help to participate better in patient participation in the Ghanaian hospital.
8. What have you observed in terms of patient participation in either public or private.
9. What have you observed in terms of patient participation regarding nursing care in Ghanaian hospitals.
10. Do you have any other issues regarding patient participation in nursing care.
